# Supplementary material for: Crystal growth, experimental and theoretical studies on the electronic structure of CNGS and Nd:CNGS
Source: Royal Society of Chemistry journal article supplement (doi:10.1039/c6ce00361c), 2016-01-01
Supplement: c6ce00361c1.pdf [file c6ce00361c1.pdf]

PCPDFWIN - [PDF # 510178, Wavelength = 1.54056 (Å)]

PDFNumber Search Print View Data Conversion Window Clear Help

51-0178 Quality: \*  
CAS Number:  
Molecular Weight: 702.47  
Volume[CD]: 282.88  
Dx: 4.123 Dm:  
Sys: Hexagonal  
Lattice: Primitive  
S.G.: P321 (150)  
Cell Parameters:  
a 8.096 b c 4.982  
 $\alpha$   $\beta$   $\gamma$

Ca3NbGa3Si2O14  
Calcium Gallium Niobium Silicate  
Ref: Ivanov, S., Zhurov, V., Karpov' Inst. of Physical Chemistry, Moscow, Russia, ICDD Grant-in-Aid, (1999)

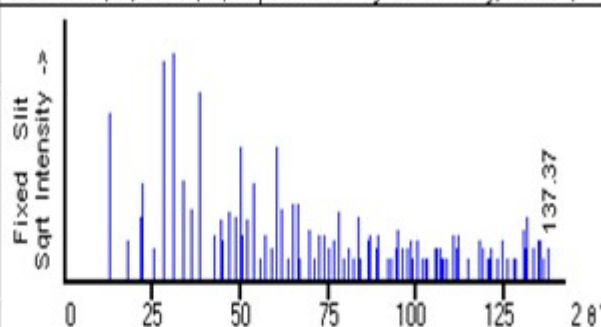

SS/FOM: F30=156(.0058, 33)  
I/cor: 2.06  
Rad: CuKα1  
Lambda: 1.54056  
Filter: Ni  
d-sp: diffractometer

| 2θ     | Int-f | h | k | l | 2θ     | Int-f | h | k | l | 2θ     | Int-f | h | k | l |
|--------|-------|---|---|---|--------|-------|---|---|---|--------|-------|---|---|---|
| 12.618 | 53    | 1 | 0 | 0 | 69.497 | 2     | 3 | 2 | 2 | 101.90 | 1     | 4 | 4 | 1 |
| 17.788 | 3     | 0 | 0 | 1 | 69.595 | 5     | 5 | 0 | 1 | 102.91 | 1     | 3 | 2 | 4 |
| 21.870 | 8     | 1 | 0 | 1 | 69.595 | 5     | 3 | 3 | 0 | 103.27 | 1     | 6 | 1 | 2 |
| 21.945 | 18    | 1 | 1 | 0 | 71.096 | <1    | 4 | 2 | 0 | 105.50 | 2     | 1 | 1 | 5 |
| 25.389 | 2     | 2 | 0 | 0 | 72.430 | 4     | 4 | 1 | 2 | 105.75 | 2     | 4 | 1 | 4 |
| 28.387 | 93    | 1 | 1 | 1 | 73.728 | 2     | 2 | 2 | 3 | 106.94 | 2     | 2 | 0 | 5 |
| 31.171 | 100   | 2 | 0 | 1 | 73.955 | 4     | 4 | 2 | 1 | 107.37 | <1    | 6 | 0 | 3 |
| 33.800 | 19    | 2 | 1 | 0 | 75.164 | 1     | 3 | 1 | 3 | 107.62 | 1     | 6 | 2 | 1 |
| 36.017 | 10    | 0 | 0 | 2 | 75.417 | 2     | 5 | 1 | 0 | 108.85 | 1     | 4 | 3 | 3 |
| 38.310 | 10    | 1 | 0 | 2 | 76.394 | 3     | 0 | 0 | 4 | 110.46 | 4     | 4 | 4 | 2 |
| 38.453 | 67    | 2 | 1 | 1 | 77.811 | 1     | 1 | 0 | 4 | 111.33 | 1     | 2 | 1 | 5 |
| 38.453 | 67    | 3 | 0 | 0 | 78.139 | 4     | 5 | 0 | 2 | 111.61 | 2     | 5 | 0 | 4 |
| 42.573 | 2     | 1 | 1 | 2 | 78.228 | 9     | 5 | 1 | 1 | 111.81 | 4     | 5 | 2 | 3 |
| 42.699 | 4     | 3 | 0 | 1 | 79.417 | 1     | 4 | 0 | 3 | 111.97 | 4     | 5 | 3 | 2 |
| 44.581 | 7     | 2 | 0 | 2 | 80.954 | 2     | 3 | 3 | 2 | 114.60 | 1     | 3 | 3 | 4 |
| 44.738 | 3     | 2 | 2 | 0 | 82.036 | 1     | 2 | 0 | 4 | 117.90 | 3     | 6 | 1 | 3 |
| 46.674 | 9     | 3 | 1 | 0 | 82.383 | 1     | 4 | 2 | 2 | 118.97 | 2     | 2 | 2 | 5 |
| 48.507 | 8     | 2 | 2 | 1 | 83.609 | 8     | 3 | 2 | 3 | 120.55 | 1     | 3 | 1 | 5 |
| 50.220 | 34    | 2 | 1 | 2 | 83.864 | 1     | 4 | 3 | 0 | 120.83 | 1     | 5 | 1 | 4 |
| 50.327 | 4     | 3 | 1 | 1 | 86.200 | 3     | 2 | 1 | 4 | 121.35 | 2     | 5 | 4 | 1 |
| 52.134 | 7     | 4 | 0 | 0 | 86.626 | 4     | 4 | 3 | 1 | 121.35 | 2     | 6 | 3 | 0 |
| 53.734 | 18    | 3 | 0 | 2 | 86.626 | 4     | 5 | 2 | 0 | 123.01 | 1     | 8 | 0 | 0 |
| 55.528 | 1     | 4 | 0 | 1 | 88.937 | 2     | 3 | 0 | 4 | 124.54 | 3     | 7 | 1 | 2 |
| 56.915 | 1     | 1 | 0 | 3 | 89.352 | 4     | 5 | 2 | 1 | 126.08 | 1     | 4 | 4 | 3 |
| 57.222 | 4     | 3 | 2 | 0 | 91.916 | 1     | 5 | 0 | 3 | 127.79 | 1     | 7 | 0 | 3 |
| 58.727 | 2     | 2 | 2 | 2 | 92.191 | 1     | 6 | 1 | 0 | 128.08 | 1     | 7 | 2 | 0 |
| 60.170 | 6     | 1 | 1 | 3 | 93.100 | <1    | 2 | 2 | 4 | 130.80 | 5     | 3 | 2 | 5 |
| 60.335 | 5     | 3 | 1 | 2 | 94.497 | 2     | 3 | 1 | 4 | 131.14 | 2     | 4 | 3 | 4 |
| 60.432 | 34    | 3 | 2 | 1 | 94.882 | 5     | 6 | 1 | 1 | 131.64 | 8     | 7 | 2 | 1 |
| 60.432 | 34    | 4 | 1 | 0 | 96.078 | 2     | 4 | 2 | 3 | 133.25 | 2     | 6 | 2 | 3 |
| 61.751 | 10    | 2 | 0 | 3 | 97.607 | 2     | 5 | 2 | 2 | 134.90 | 3     | 5 | 2 | 4 |
| 63.548 | 1     | 4 | 1 | 1 | 98.675 | 3     | 4 | 0 | 4 | 135.37 | 3     | 6 | 3 | 2 |
| 64.998 | 11    | 4 | 0 | 2 | 99.119 | 1     | 4 | 4 | 0 | 136.11 | 1     | 0 | 0 | 6 |
| 66.367 | 11    | 2 | 1 | 3 | 100.26 | 3     | 5 | 1 | 3 | 137.37 | 2     | 8 | 0 | 2 |
| 66.636 | 1     | 5 | 0 | 0 | 100.52 | 1     | 5 | 3 | 0 |        |       |   |   |   |
